# Supplementary figures and images for: Bordetella adenylate cyclase toxin is a unique ligand of the integrin complement receptor 3
Source: eLife journal article supplement (doi:10.7554/elife.10766), 2015-12-09

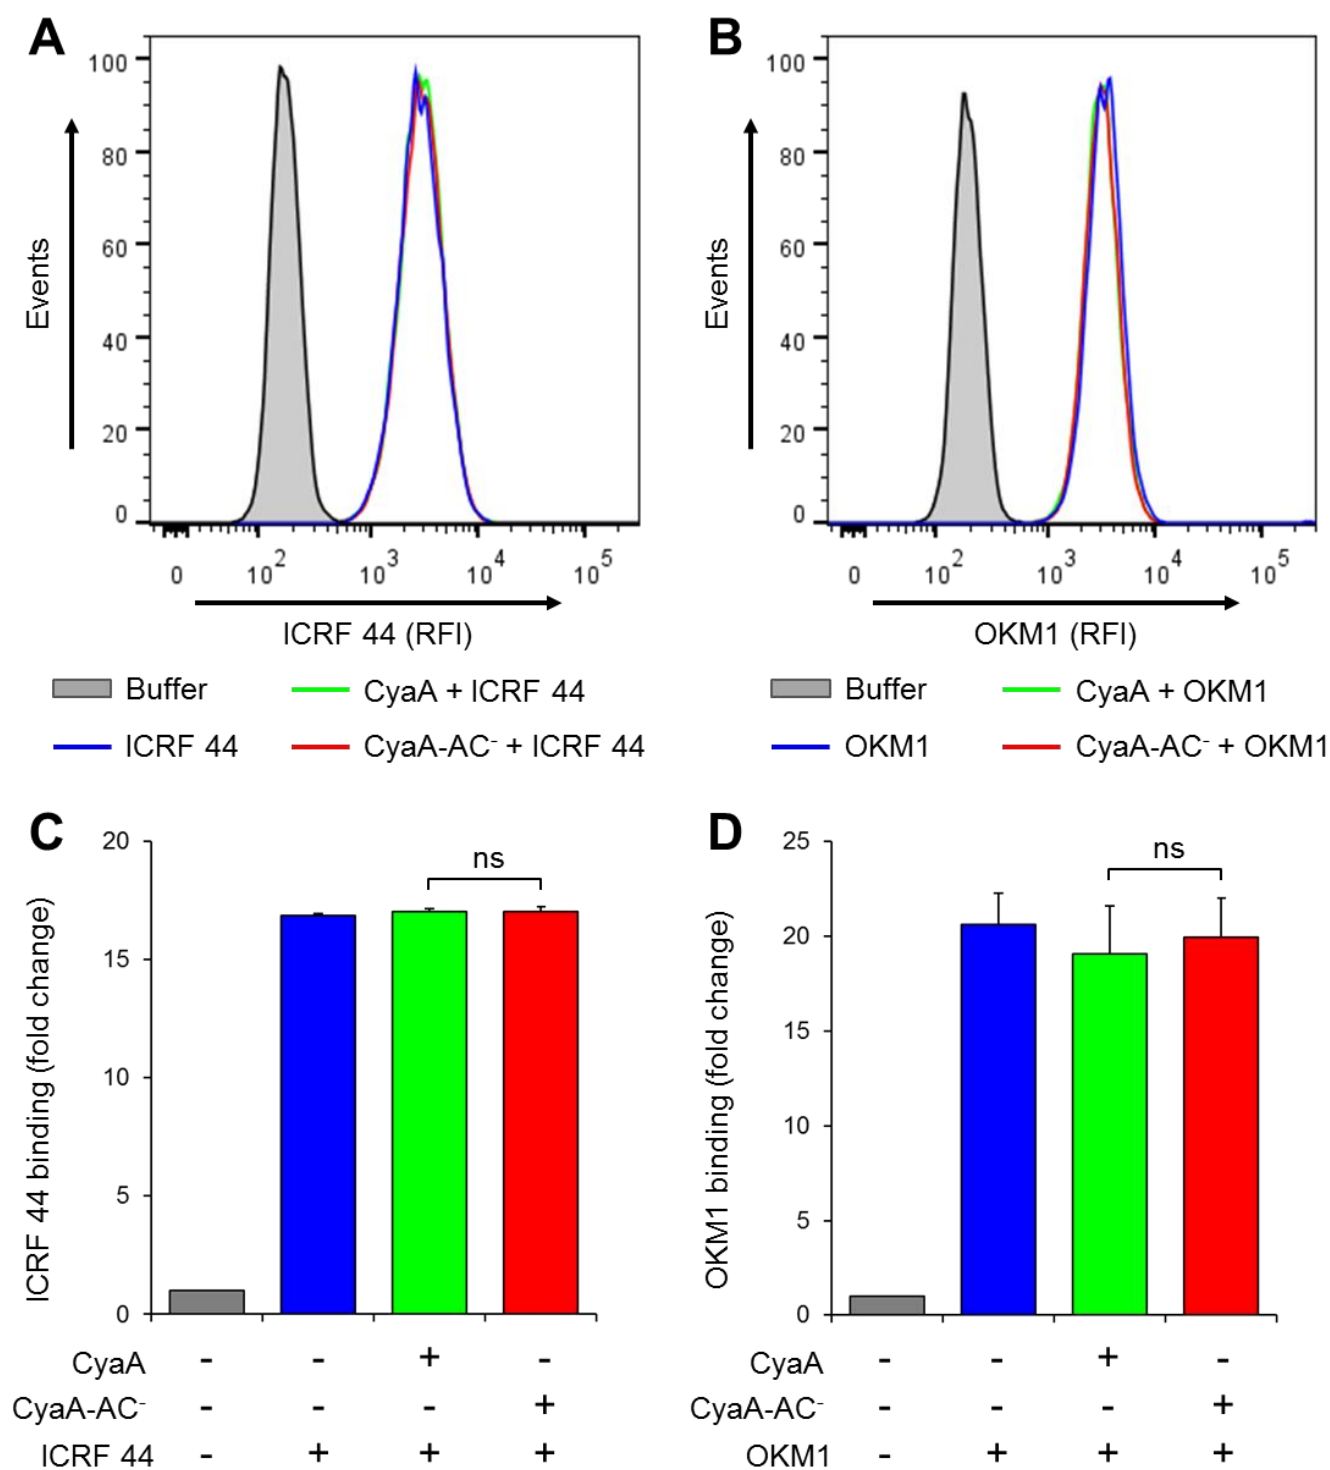

**Figure 7-figure supplement 2**

Supplement: supp [file elife-10766-supp-v1.zip]

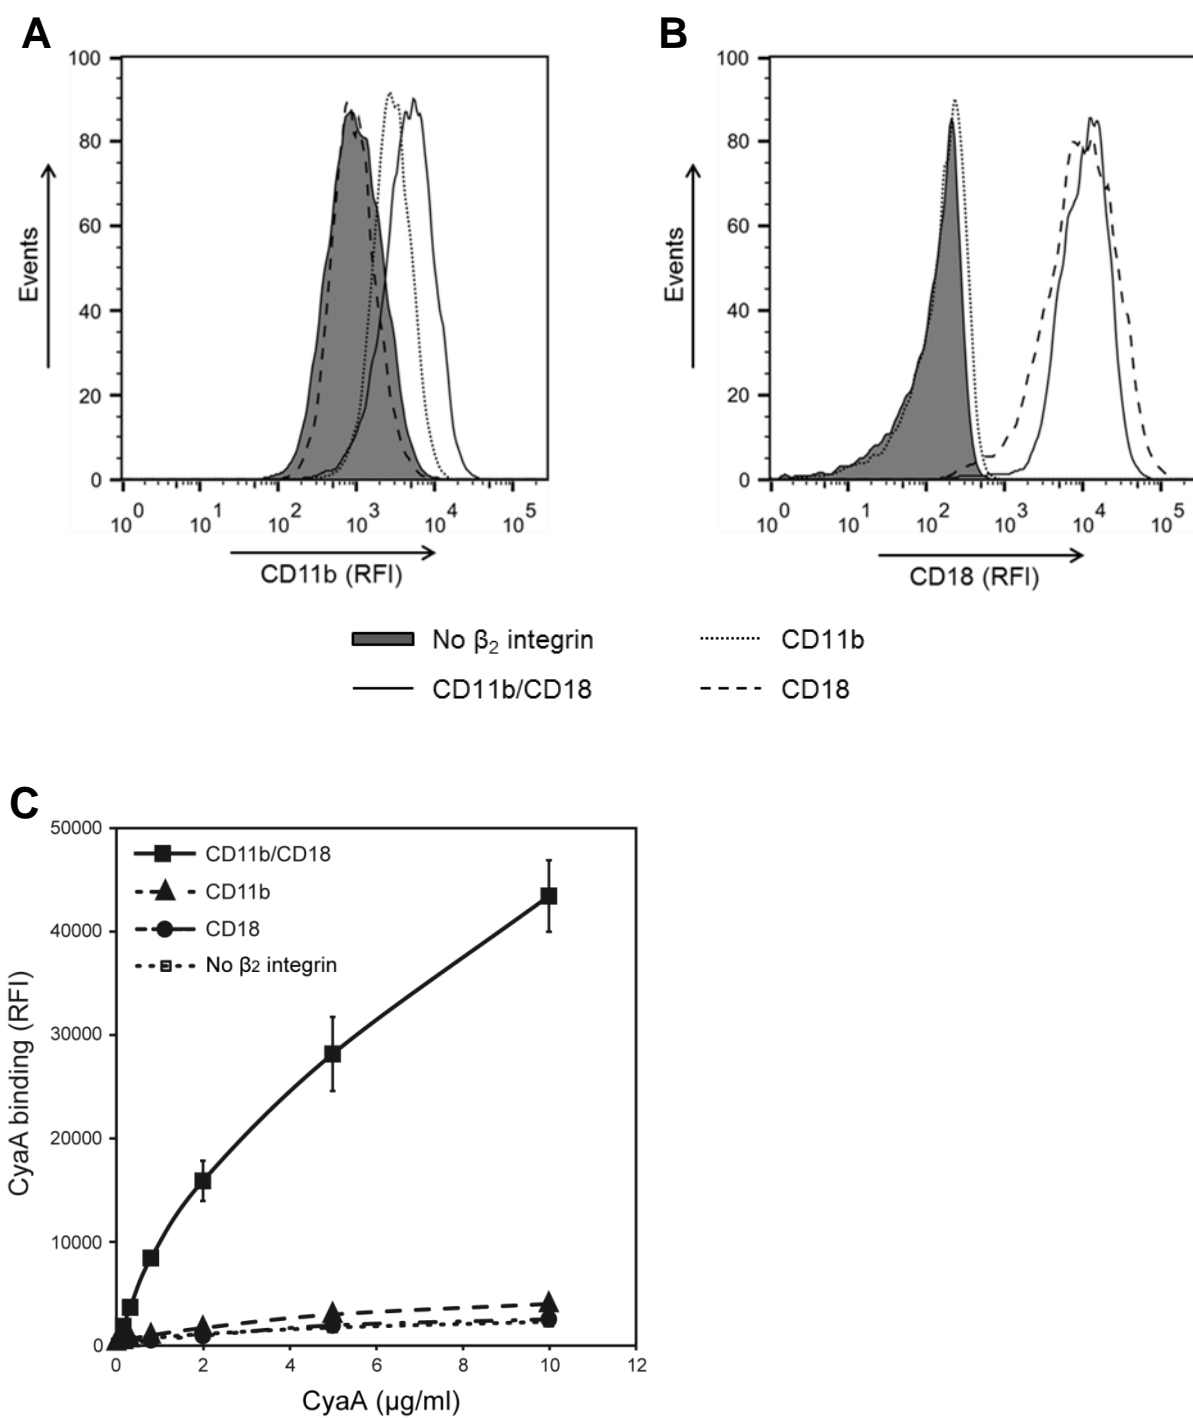

**Figure 1-figure supplement 3**

Supplement: supp [file elife-10766-supp-v1.zip]

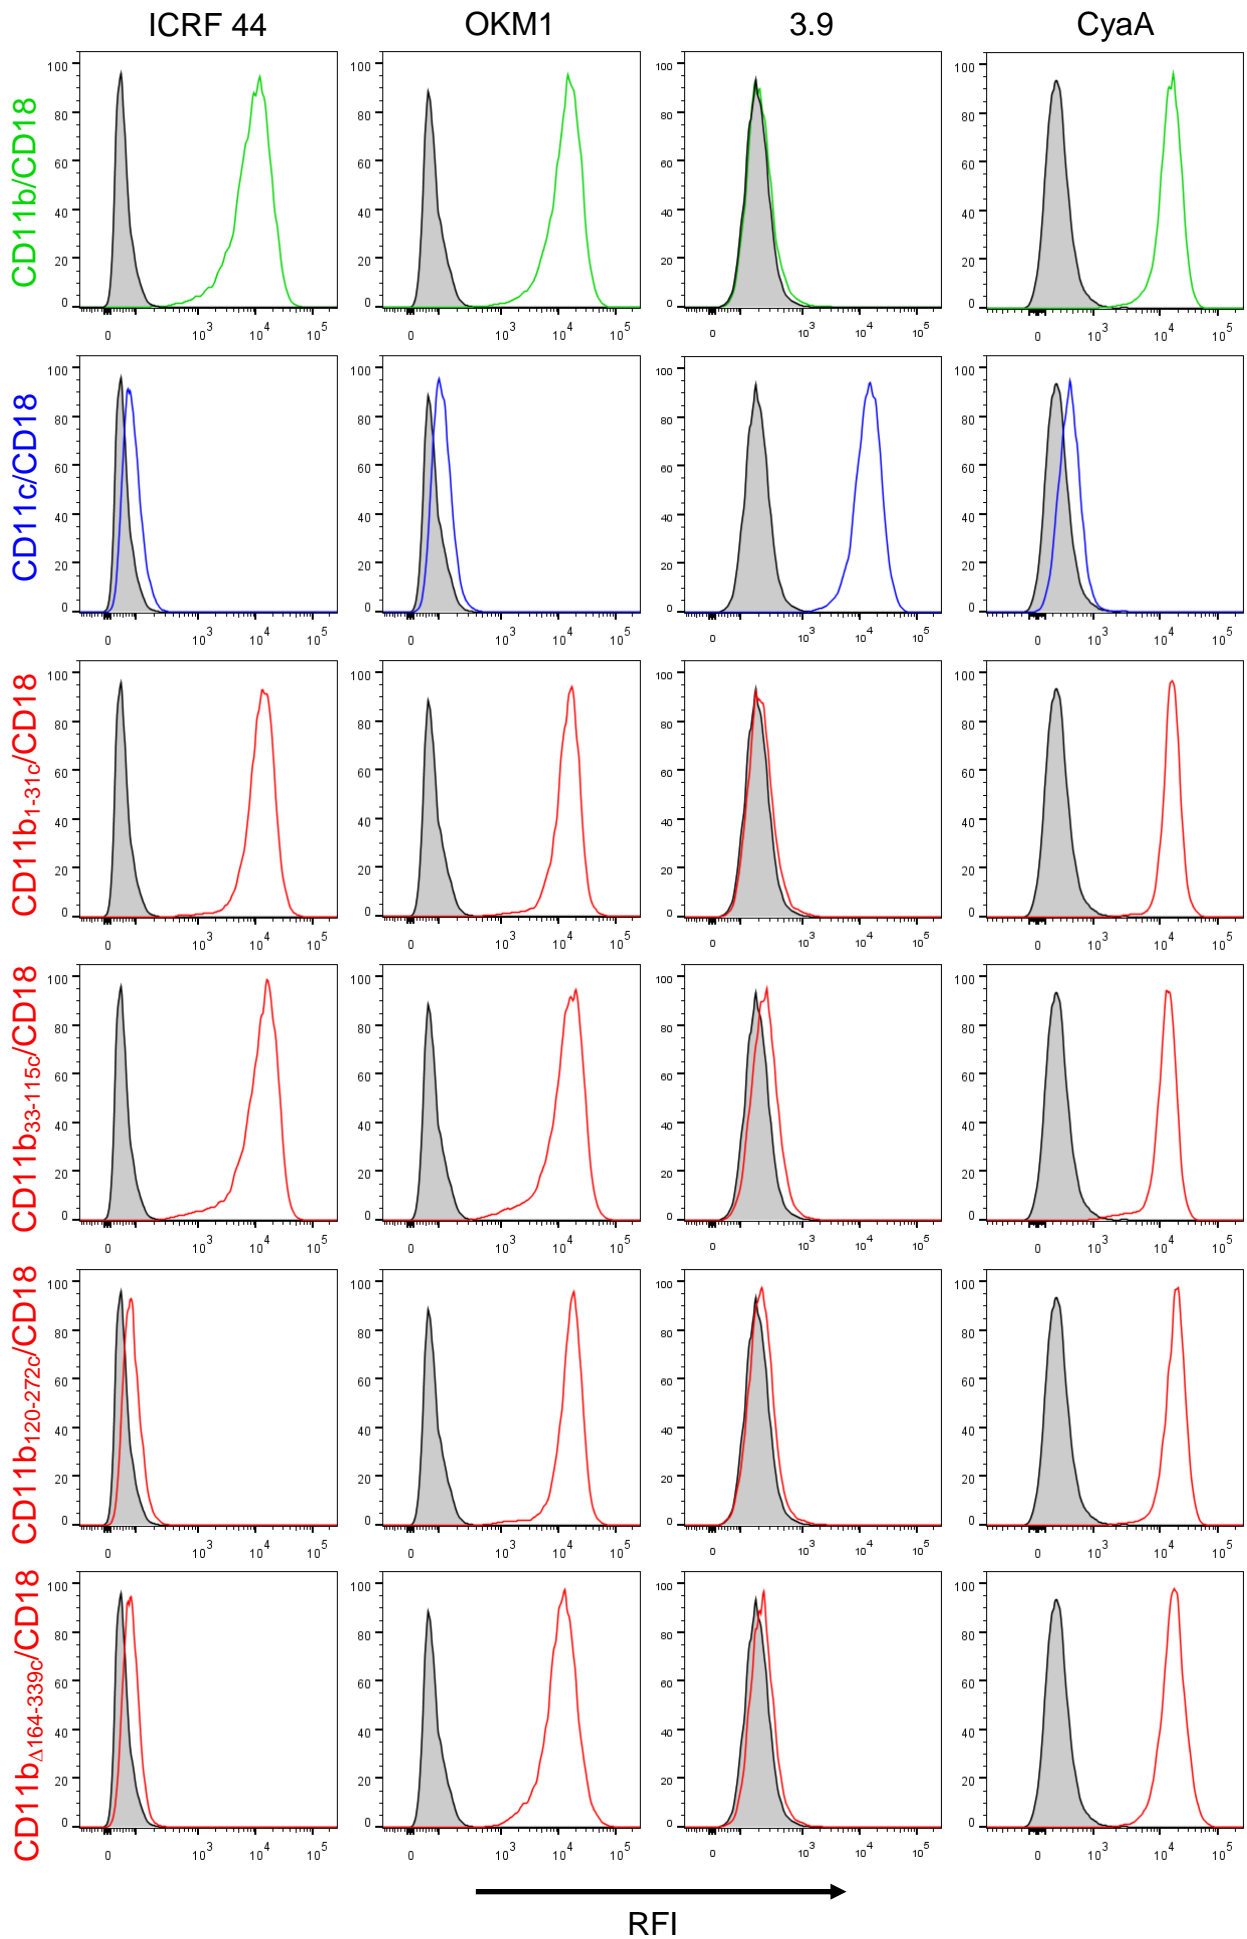

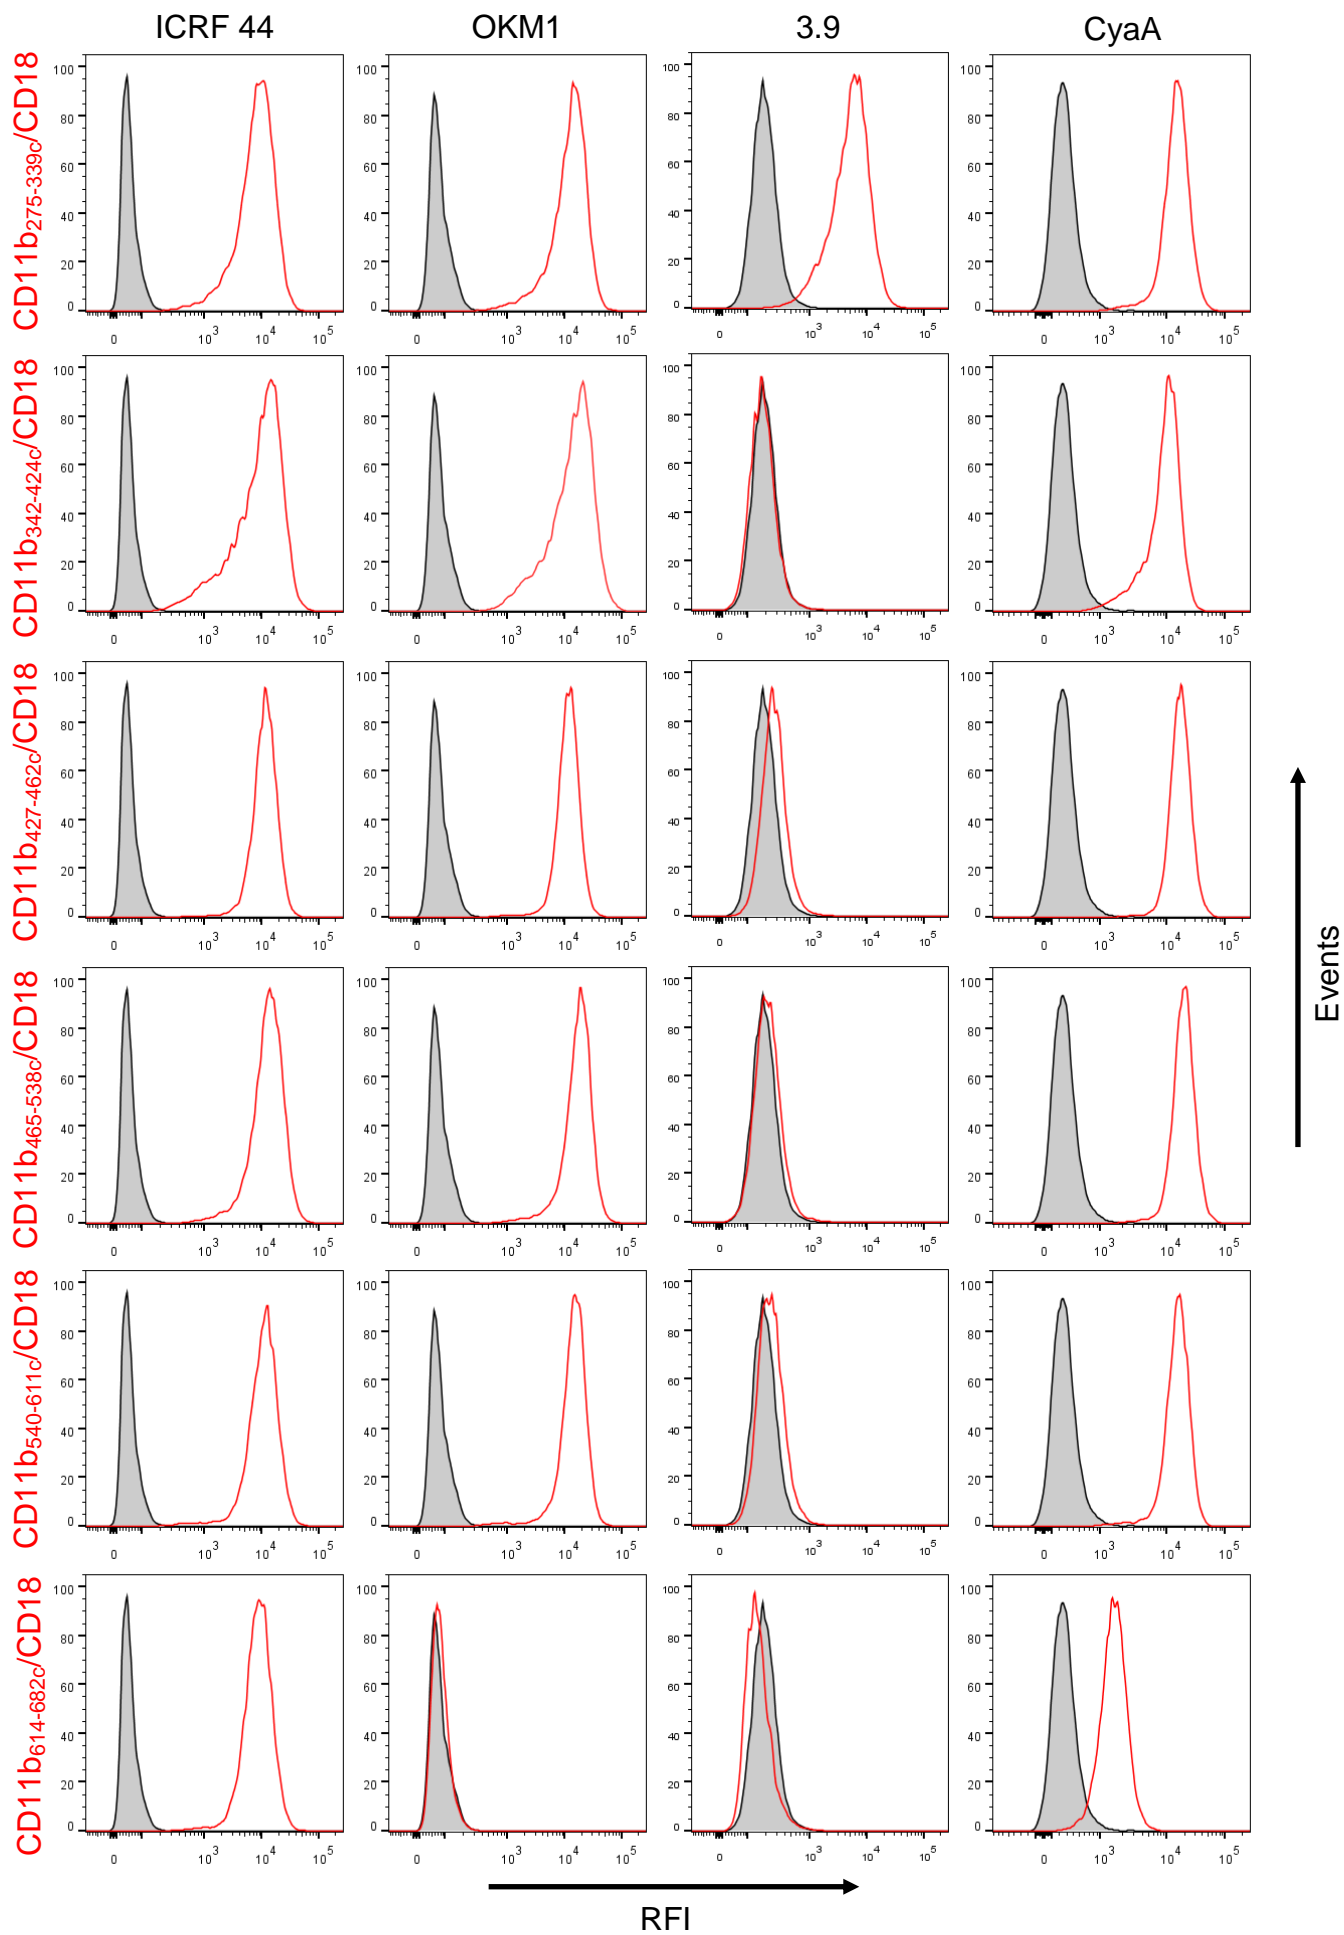

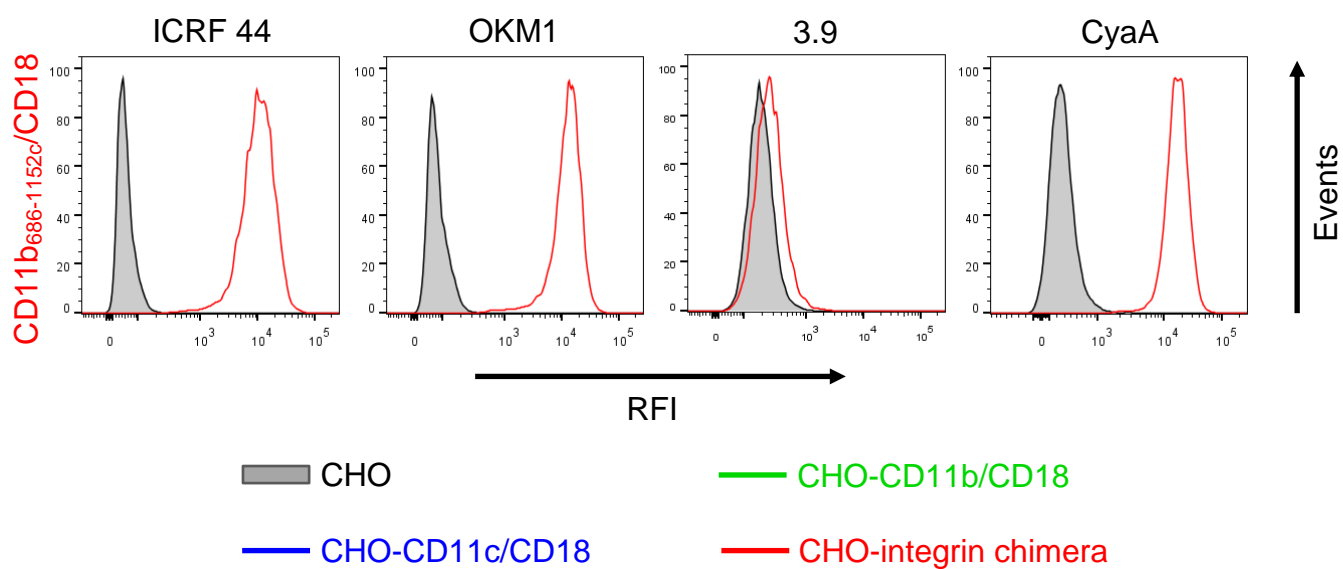

**Figure 1-figure supplement 2**

Supplement: supp [file elife-10766-supp-v1.zip]

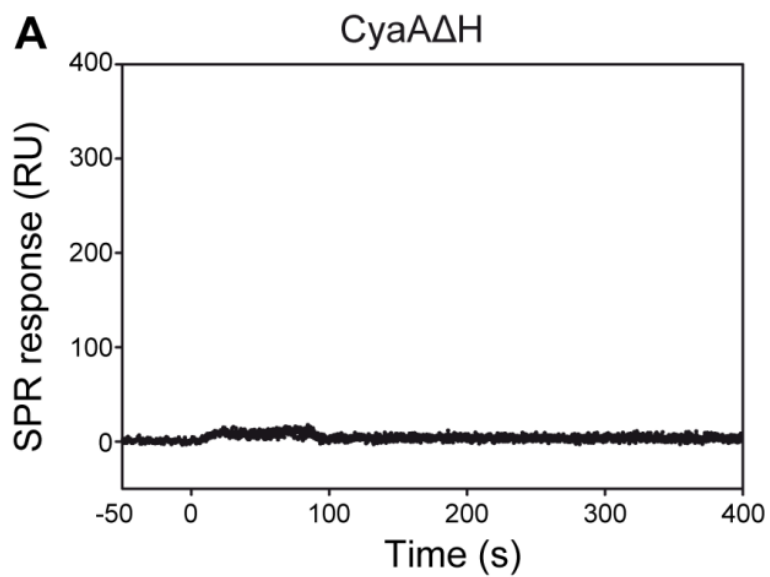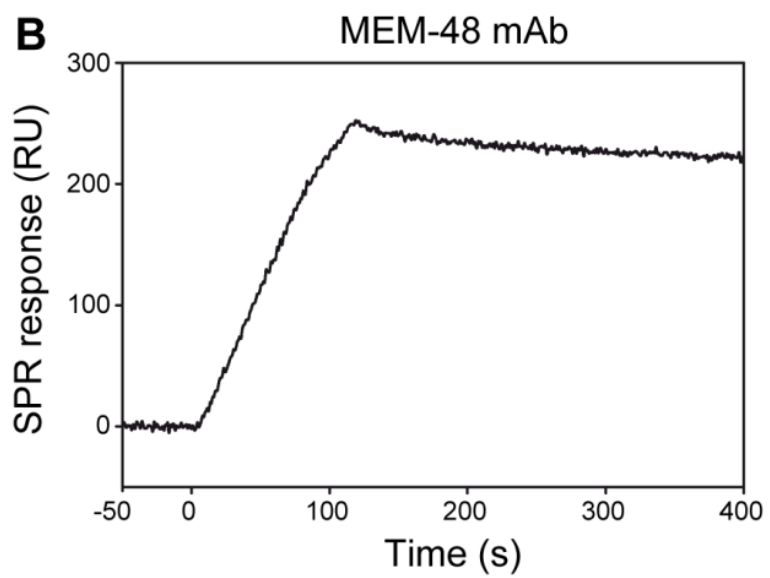

**Figure 9-figure supplement 3**

Supplement: supp [file elife-10766-supp-v1.zip]

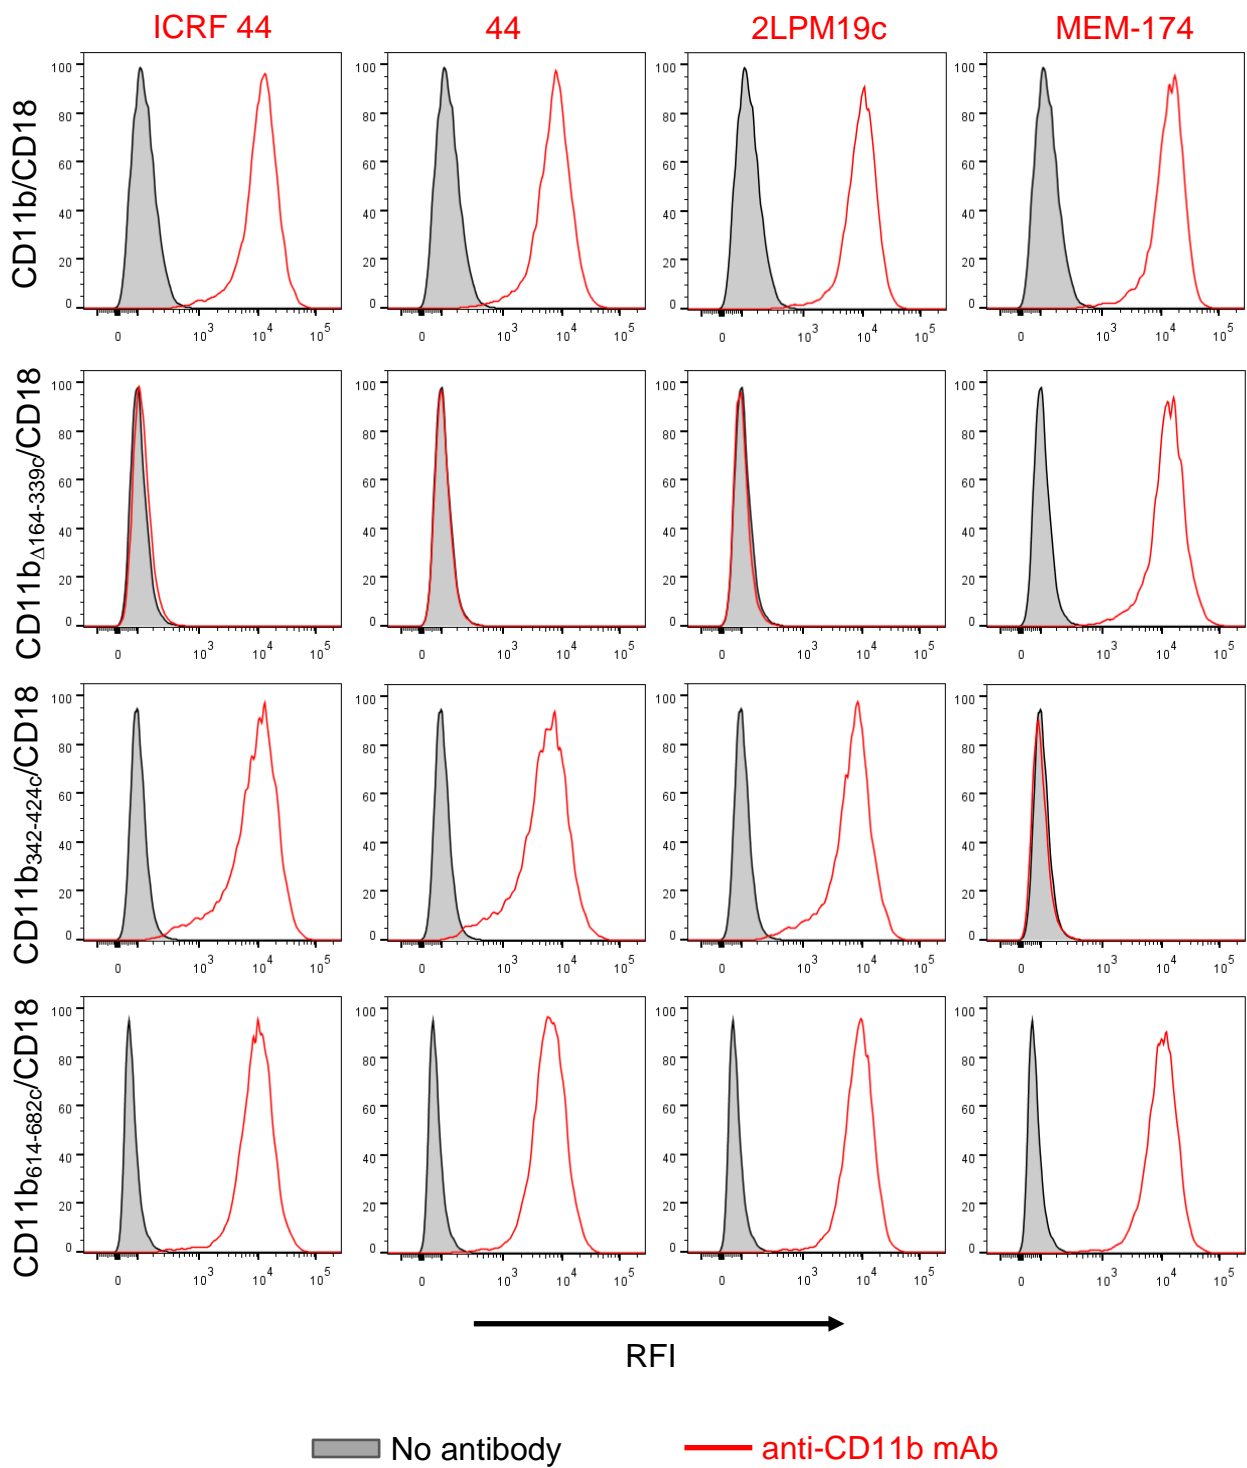

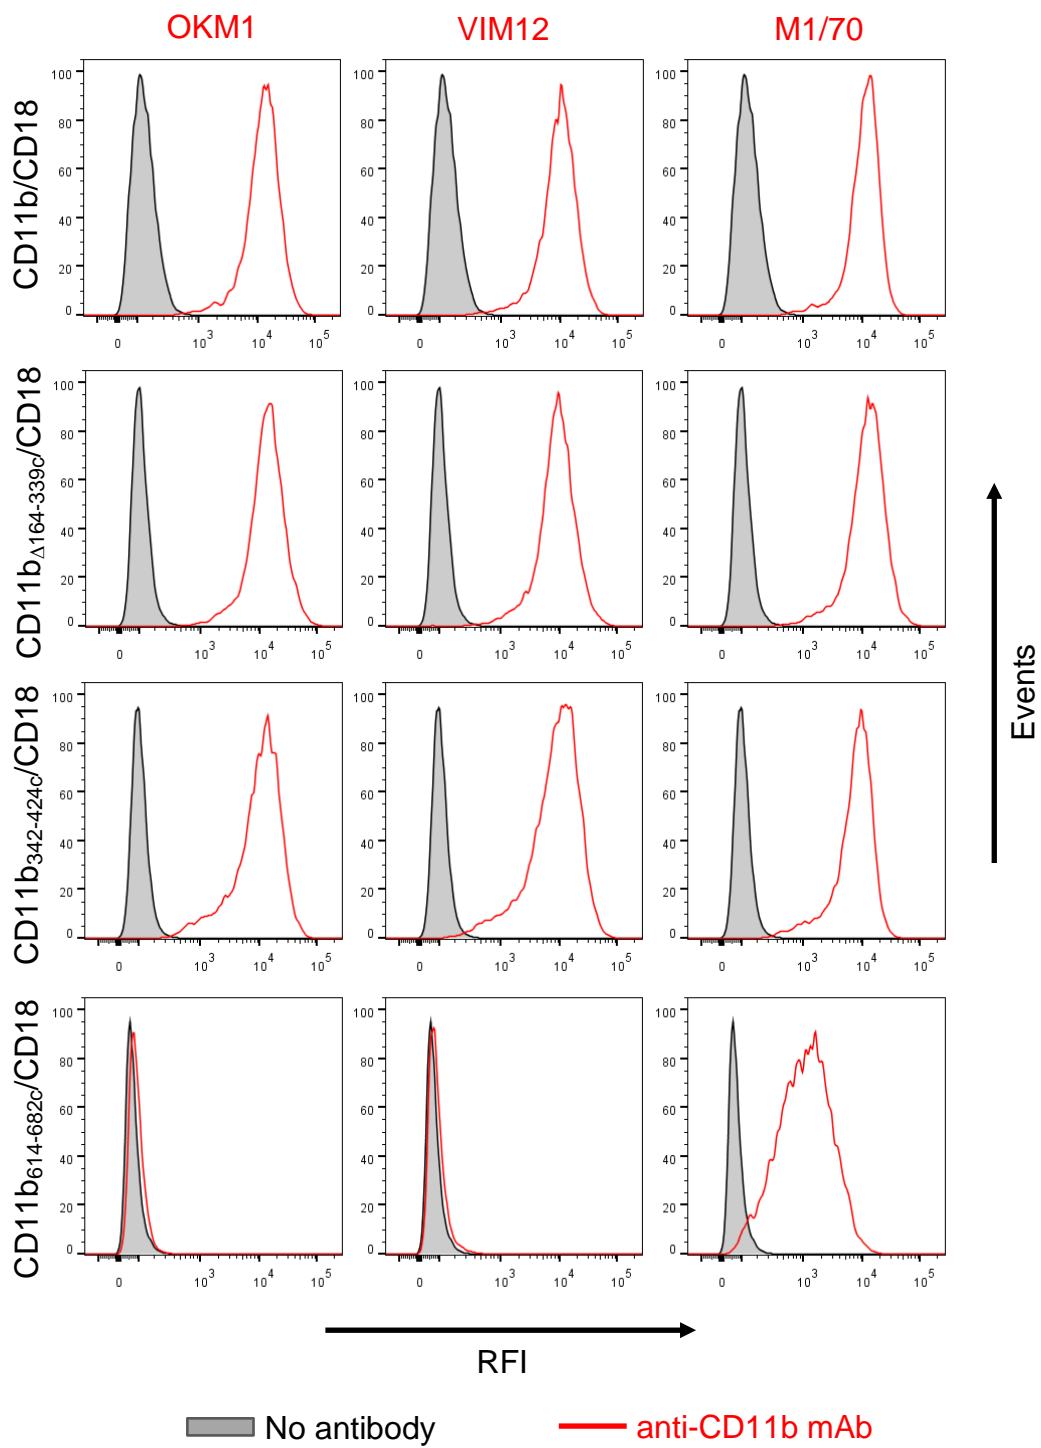

**Figure 2-figure supplement 1**

Supplement: supp [file elife-10766-supp-v1.zip]

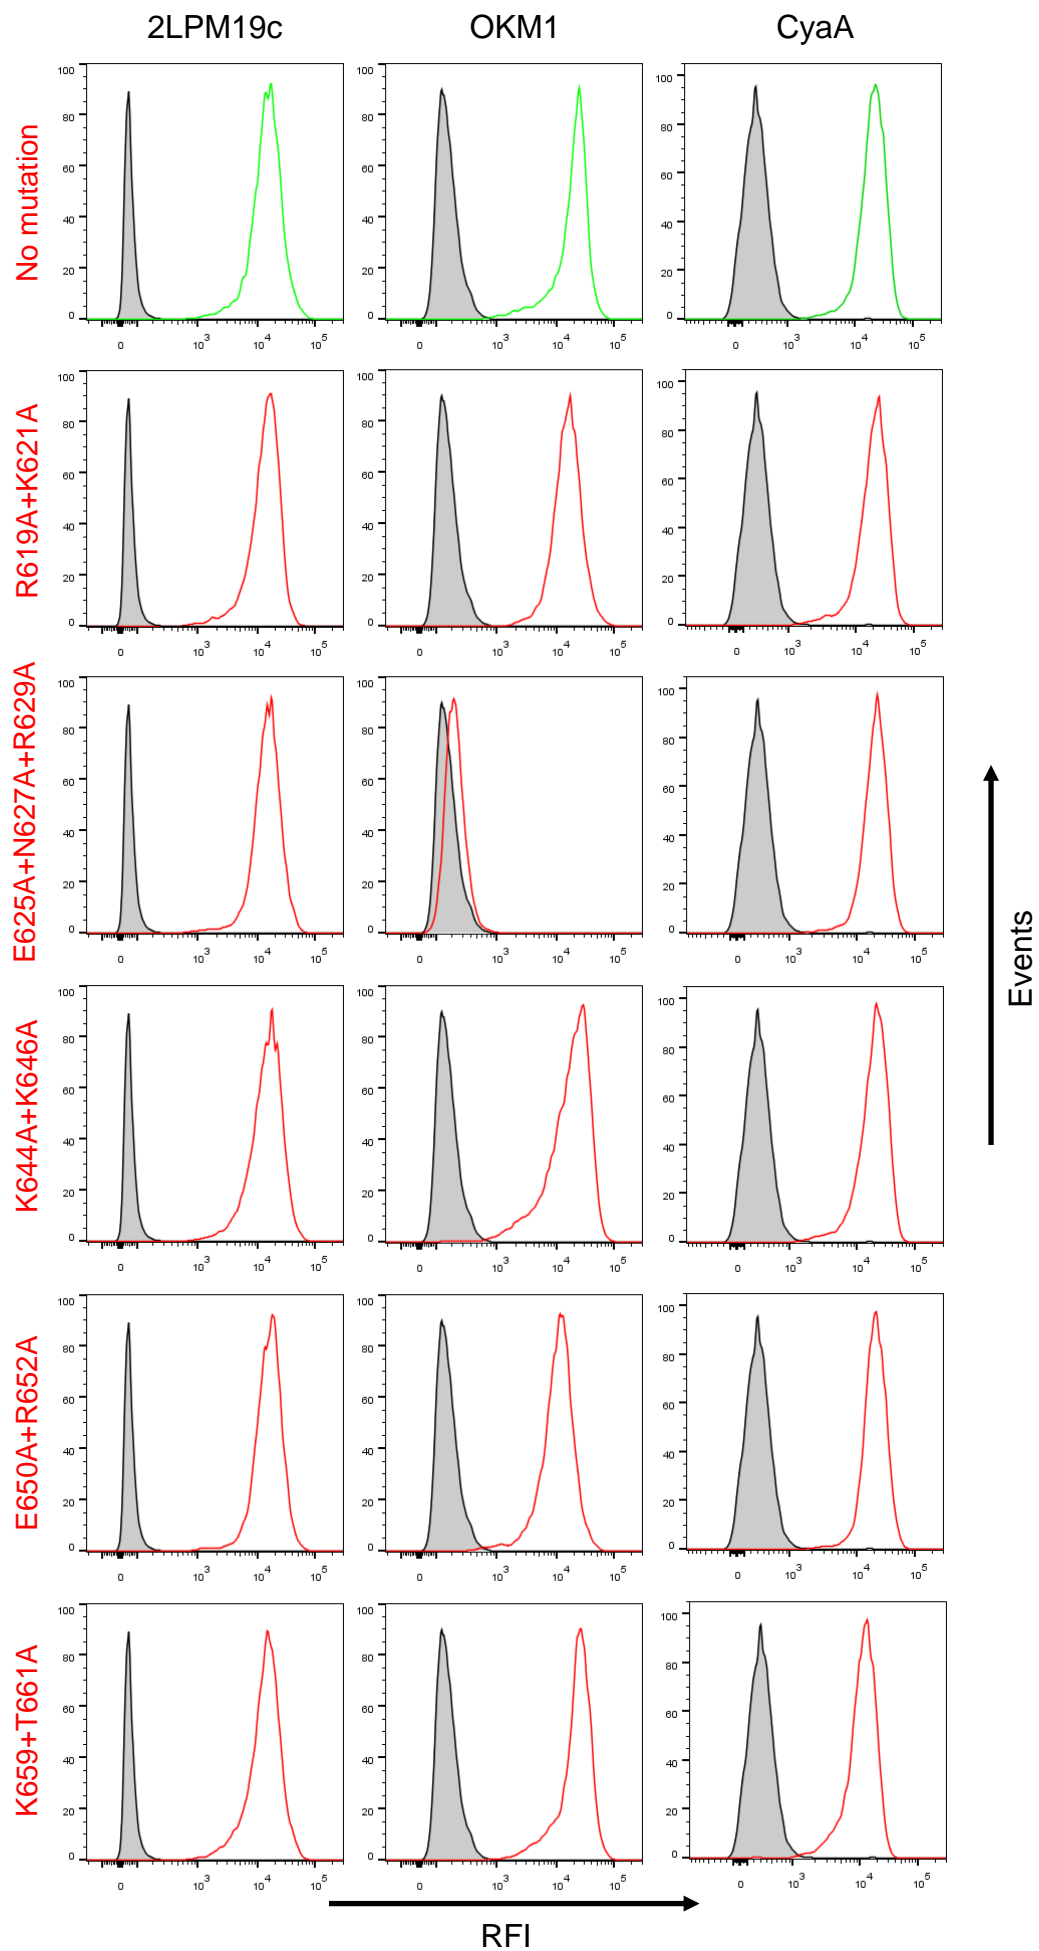

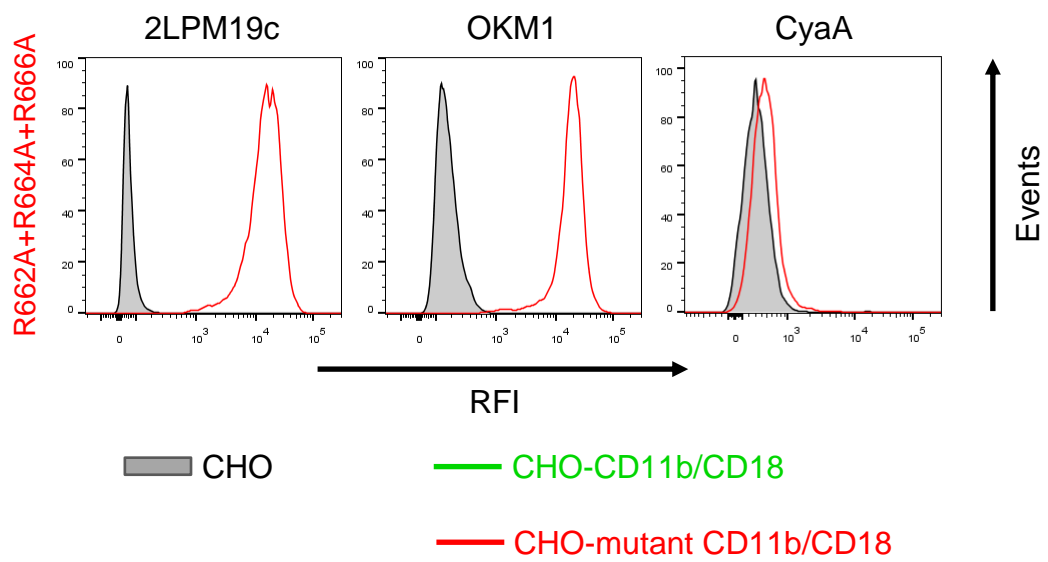

Figure 4-figure supplement 1

Supplement: supp [file elife-10766-supp-v1.zip]

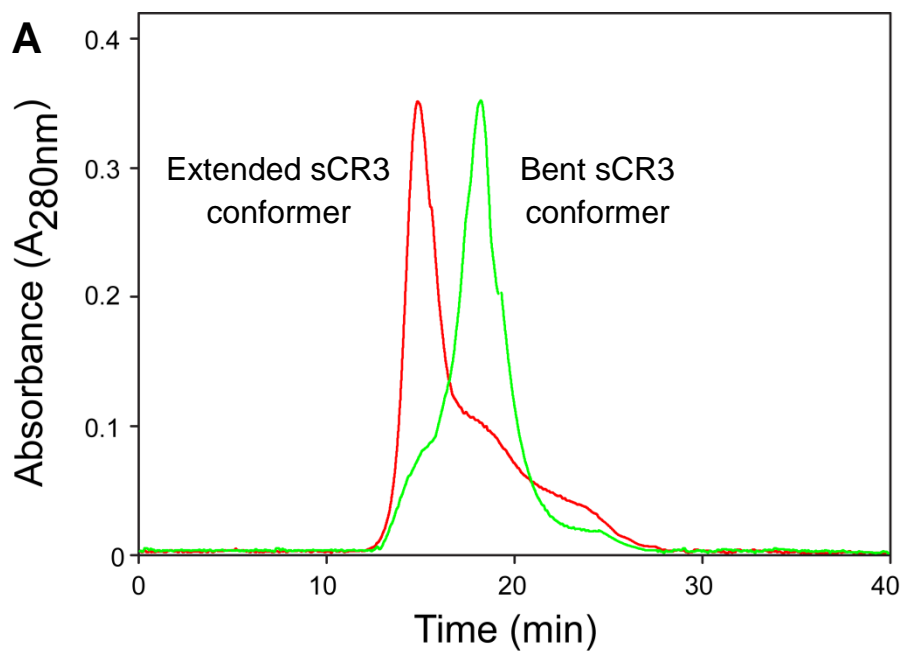

**B** Extended sCR3 conformer

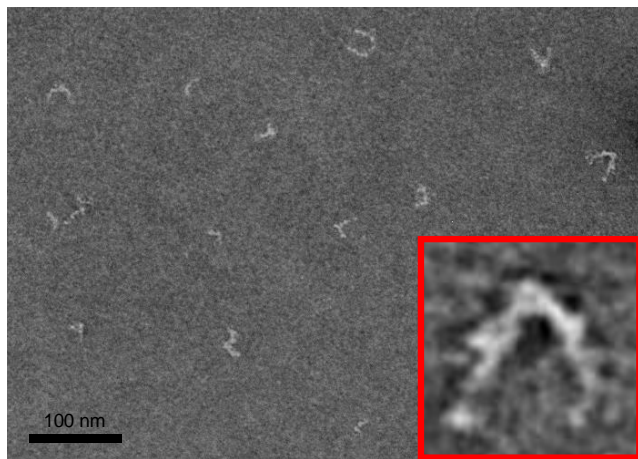

**C** Bent sCR3 conformer

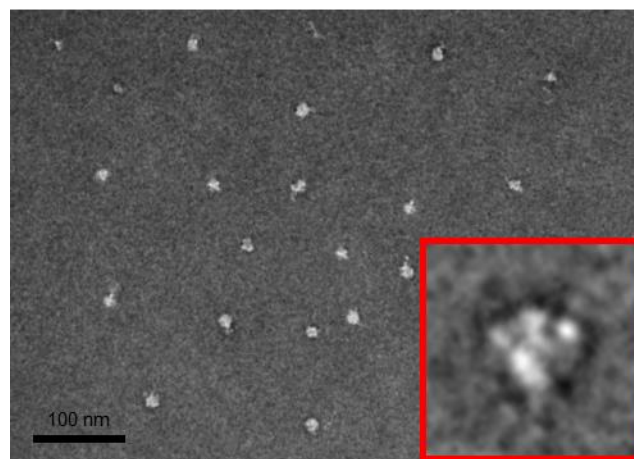

**Figure 5-figure supplement 2**

Supplement: supp [file elife-10766-supp-v1.zip]

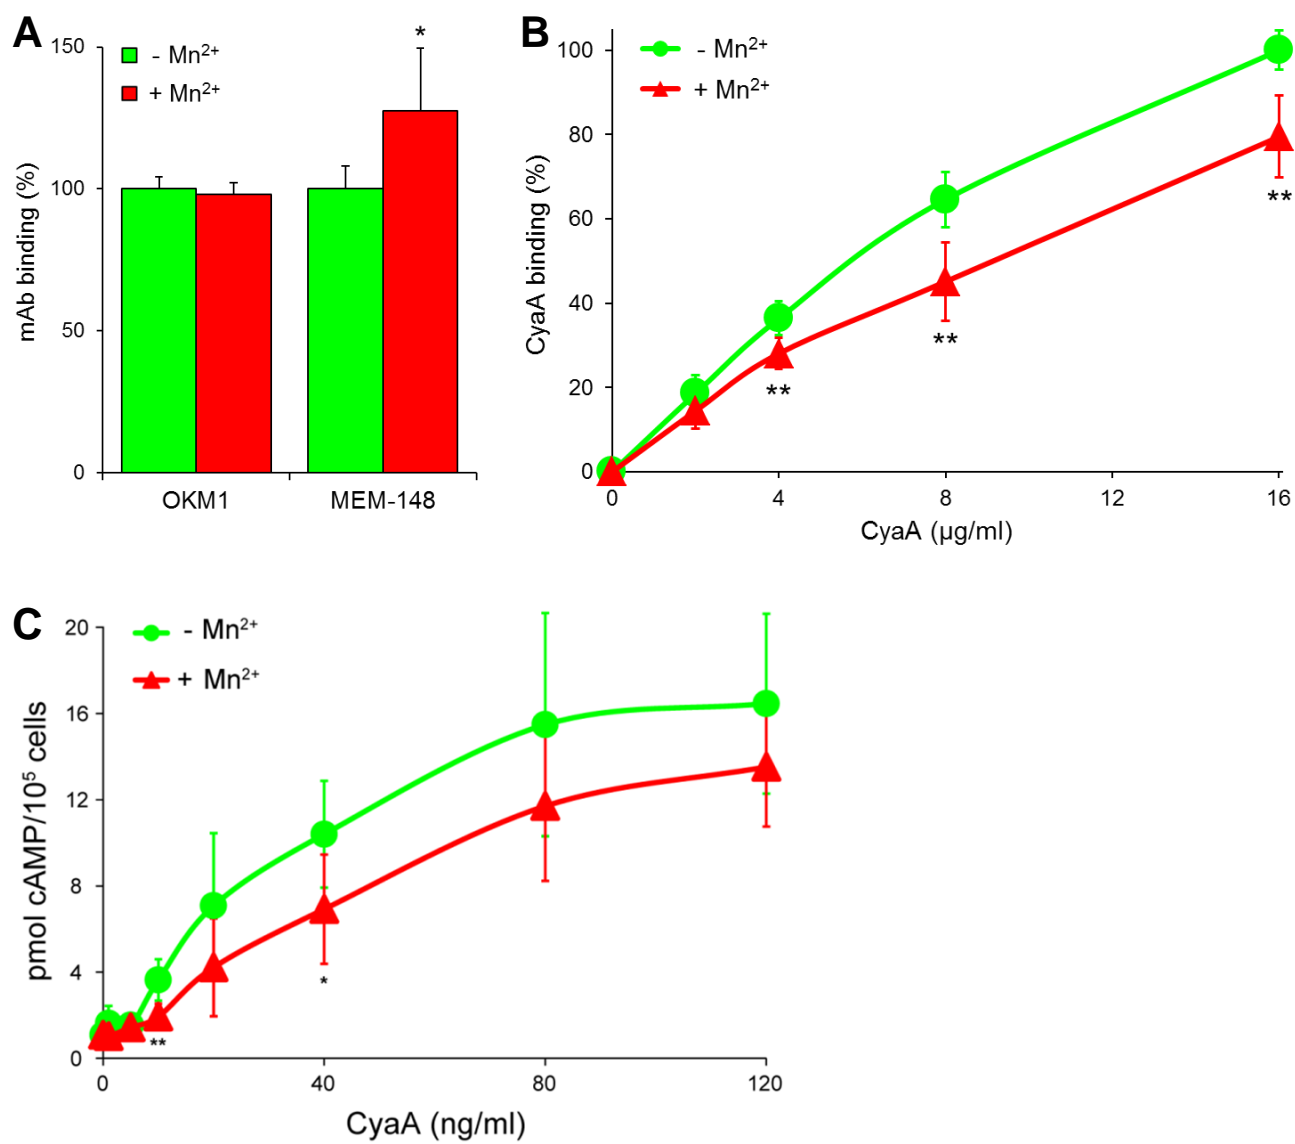

Figure 5-figure supplement 1

Supplement: supp [file elife-10766-supp-v1.zip]

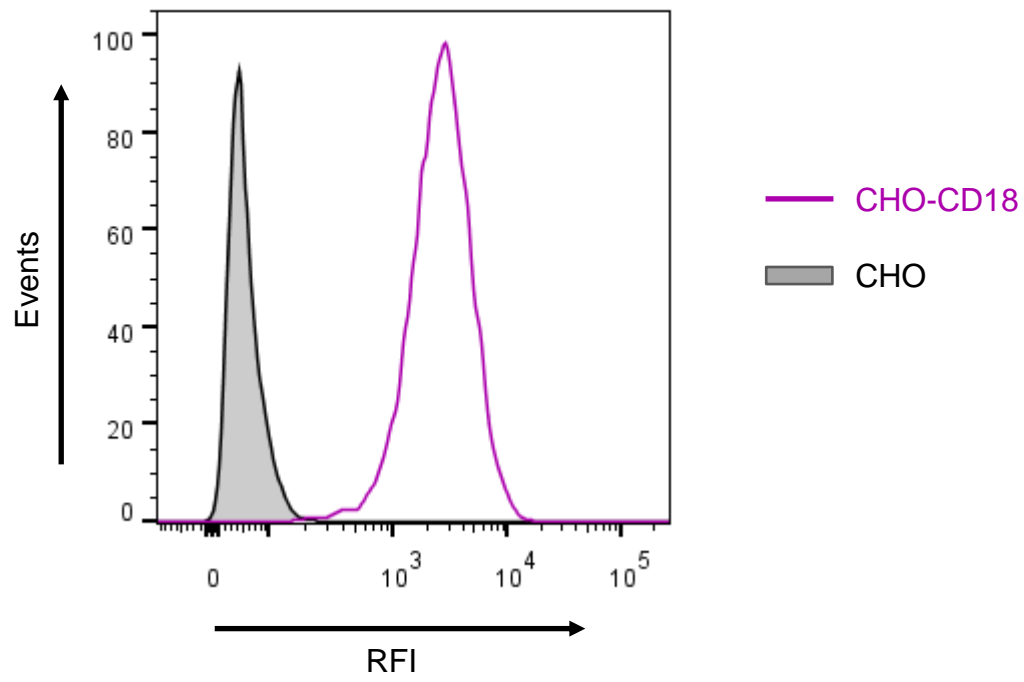

**Figure 1-figure supplement 1**

Supplement: supp [file elife-10766-supp-v1.zip]

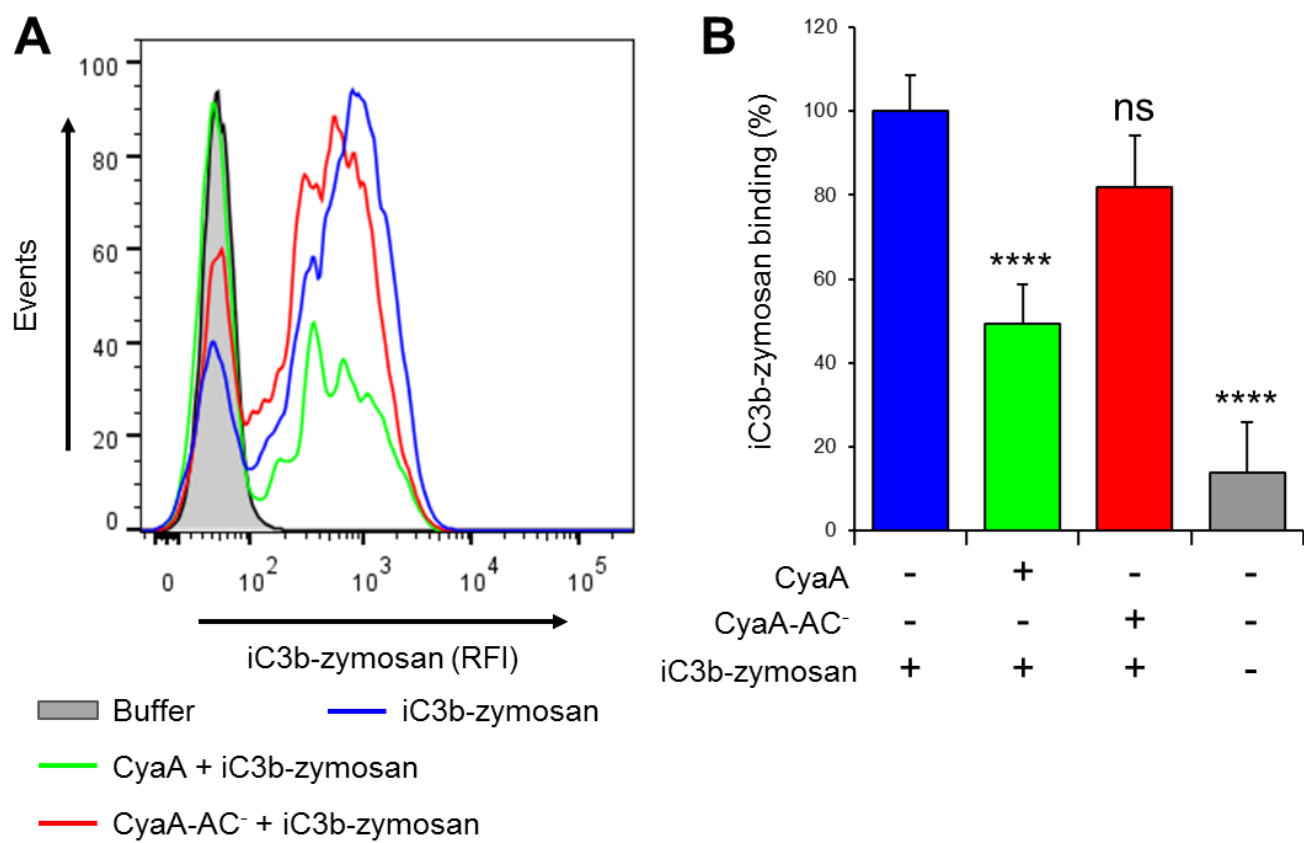

**Figure 7-figure supplement 3**

Supplement: supp [file elife-10766-supp-v1.zip]

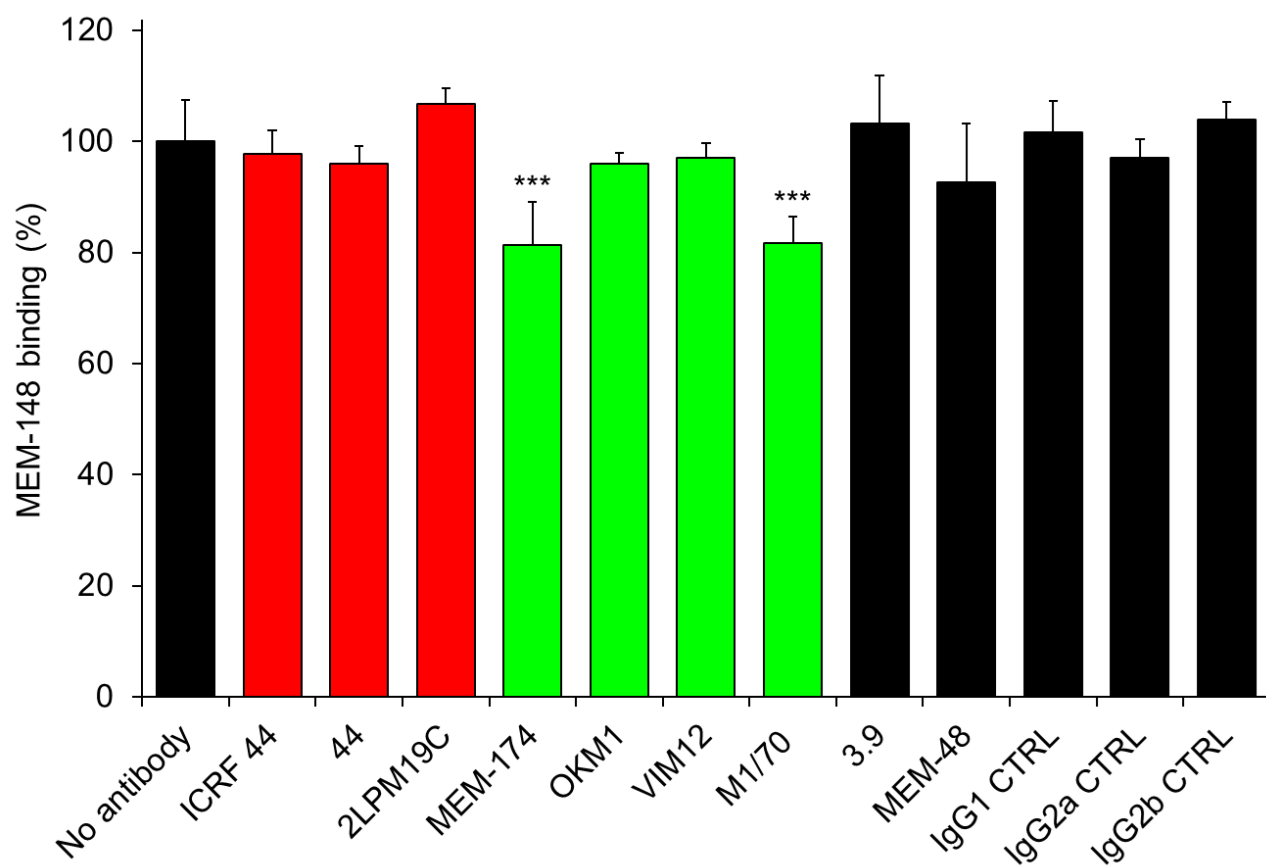

**Figure 2-figure supplement 2**

Supplement: supp [file elife-10766-supp-v1.zip]

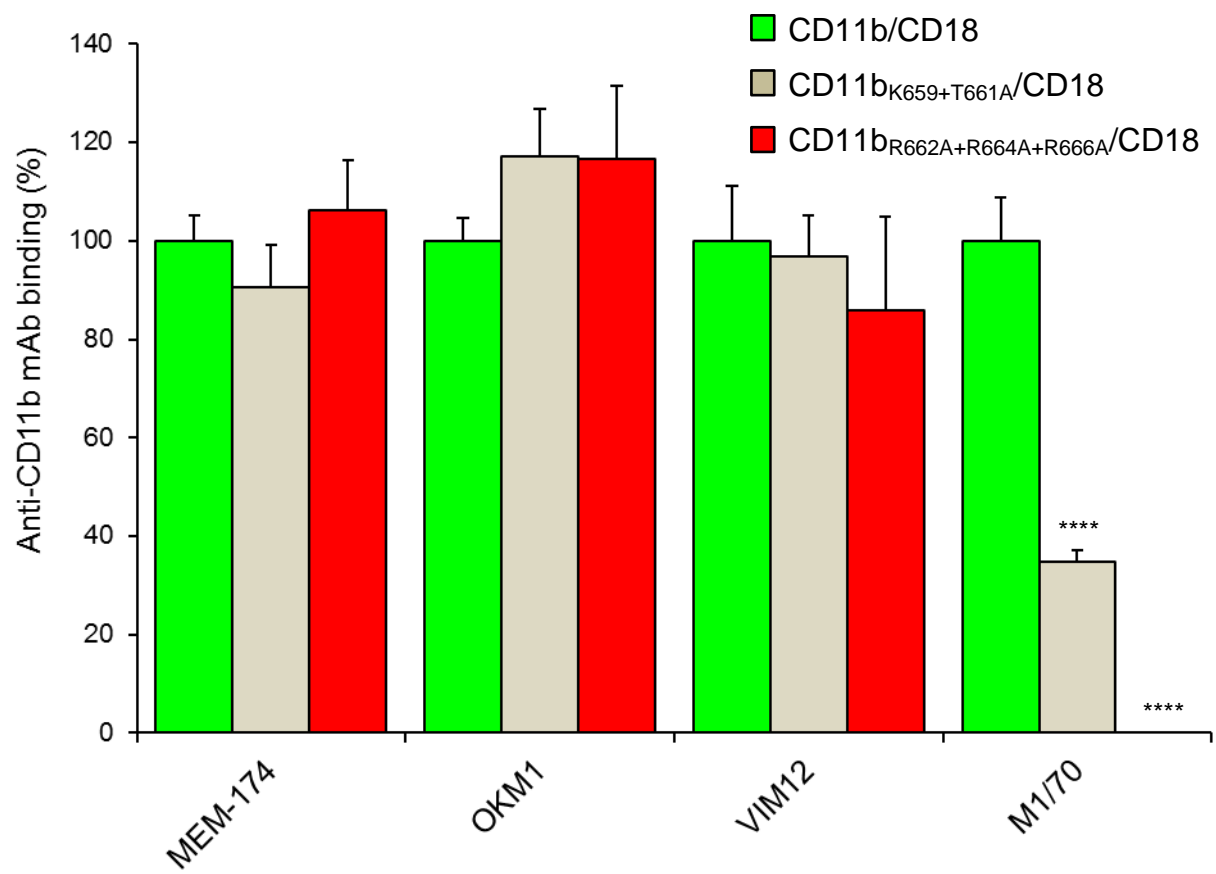

Figure 4-figure supplement 2

Supplement: supp [file elife-10766-supp-v1.zip]

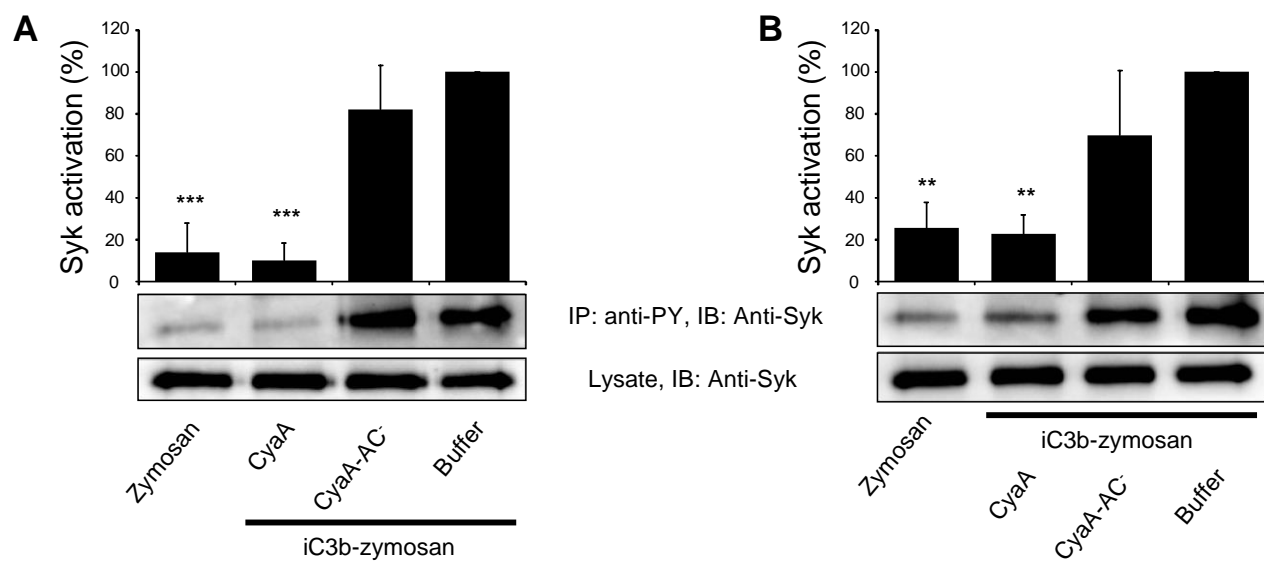

**Figure 7-figure supplement 6**

Supplement: supp [file elife-10766-supp-v1.zip]

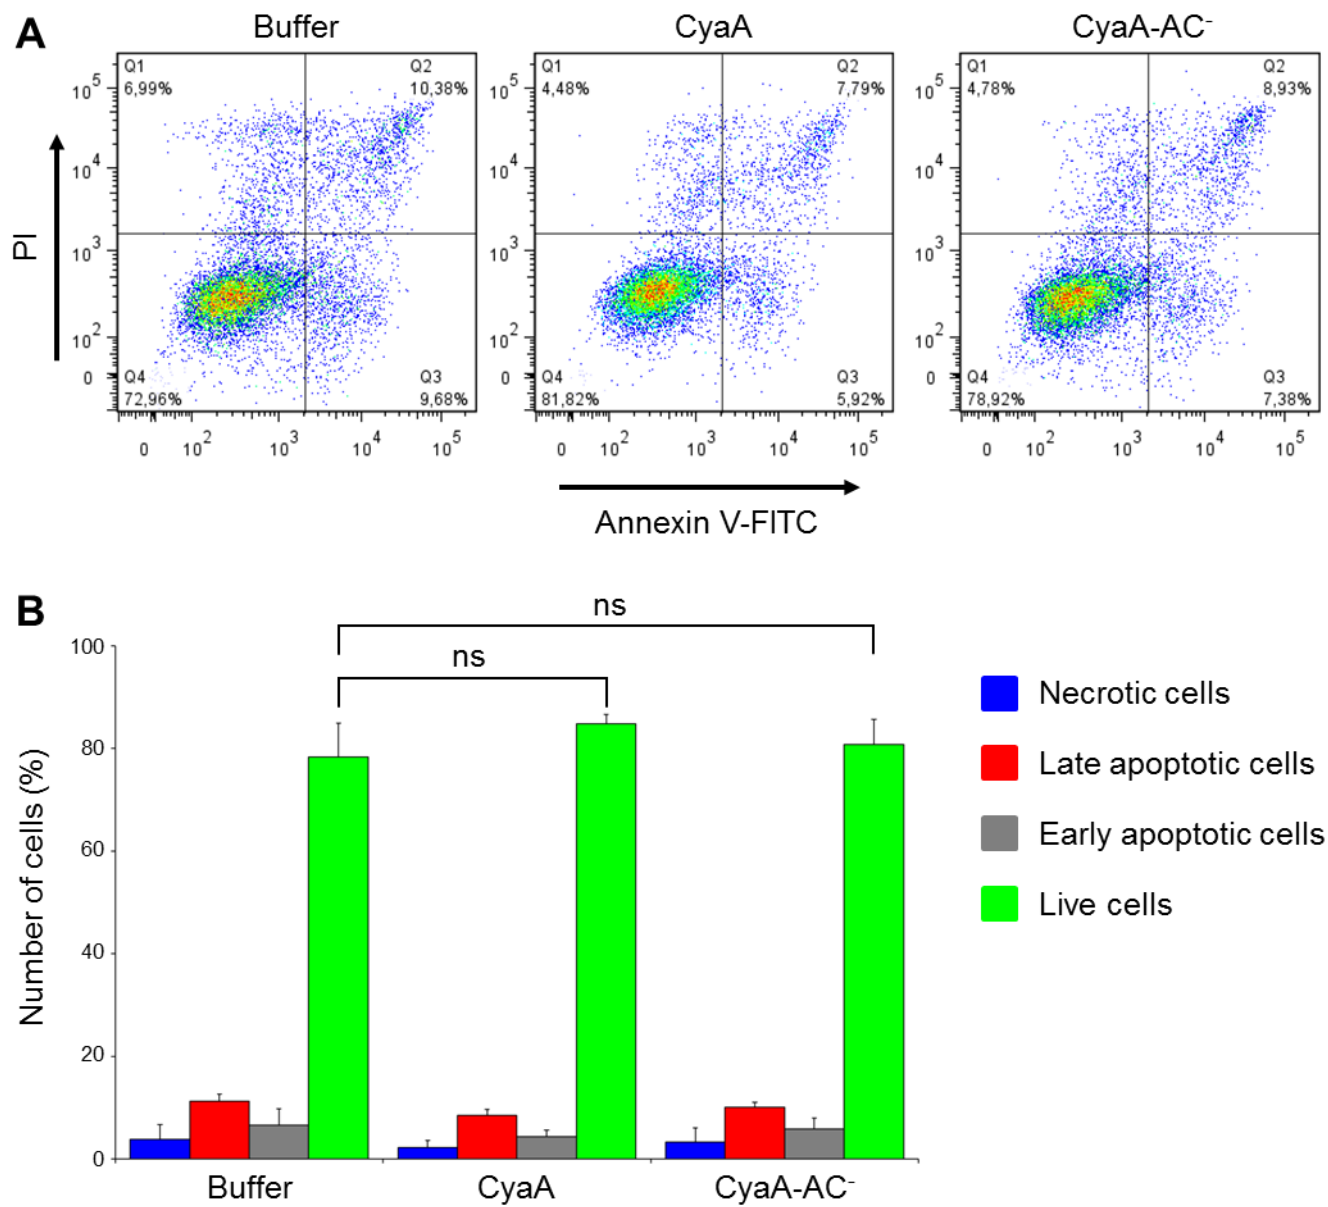

**Figure 7-figure supplement 5**

Supplement: supp [file elife-10766-supp-v1.zip]

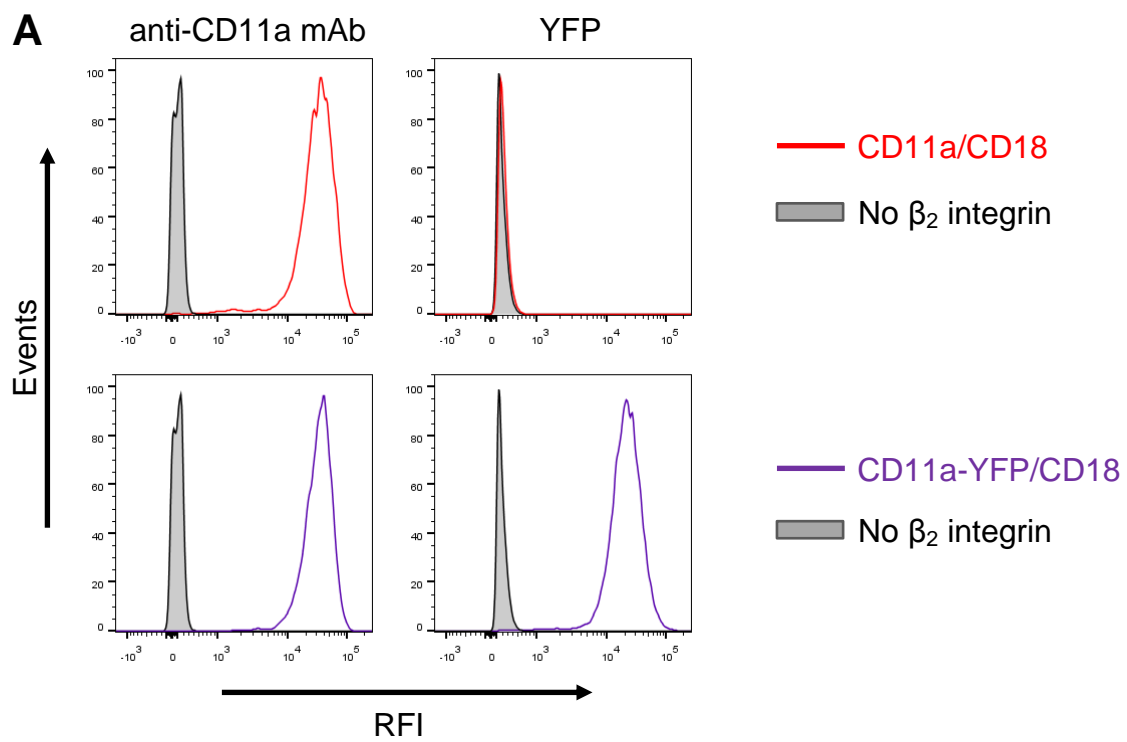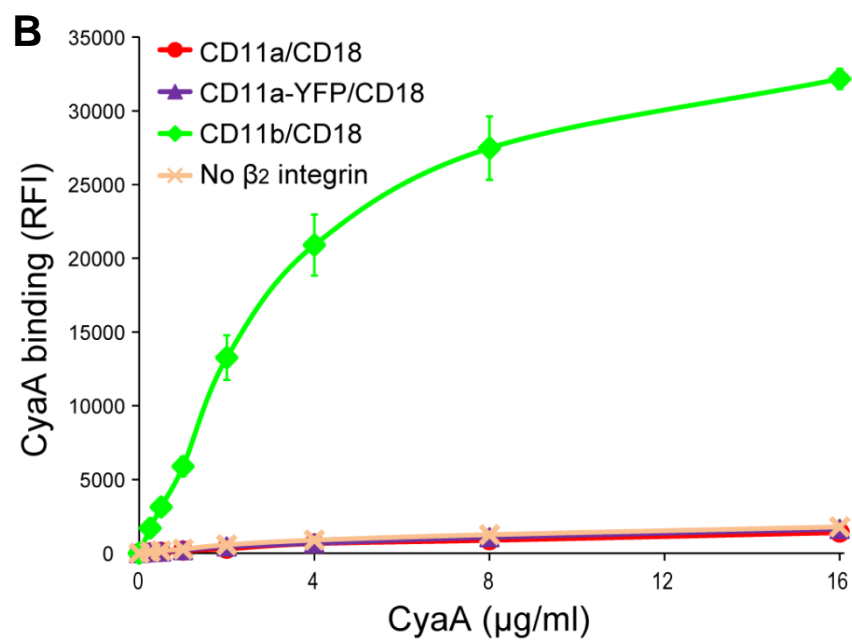

**Figure 9-figure supplement 2**

Supplement: supp [file elife-10766-supp-v1.zip]

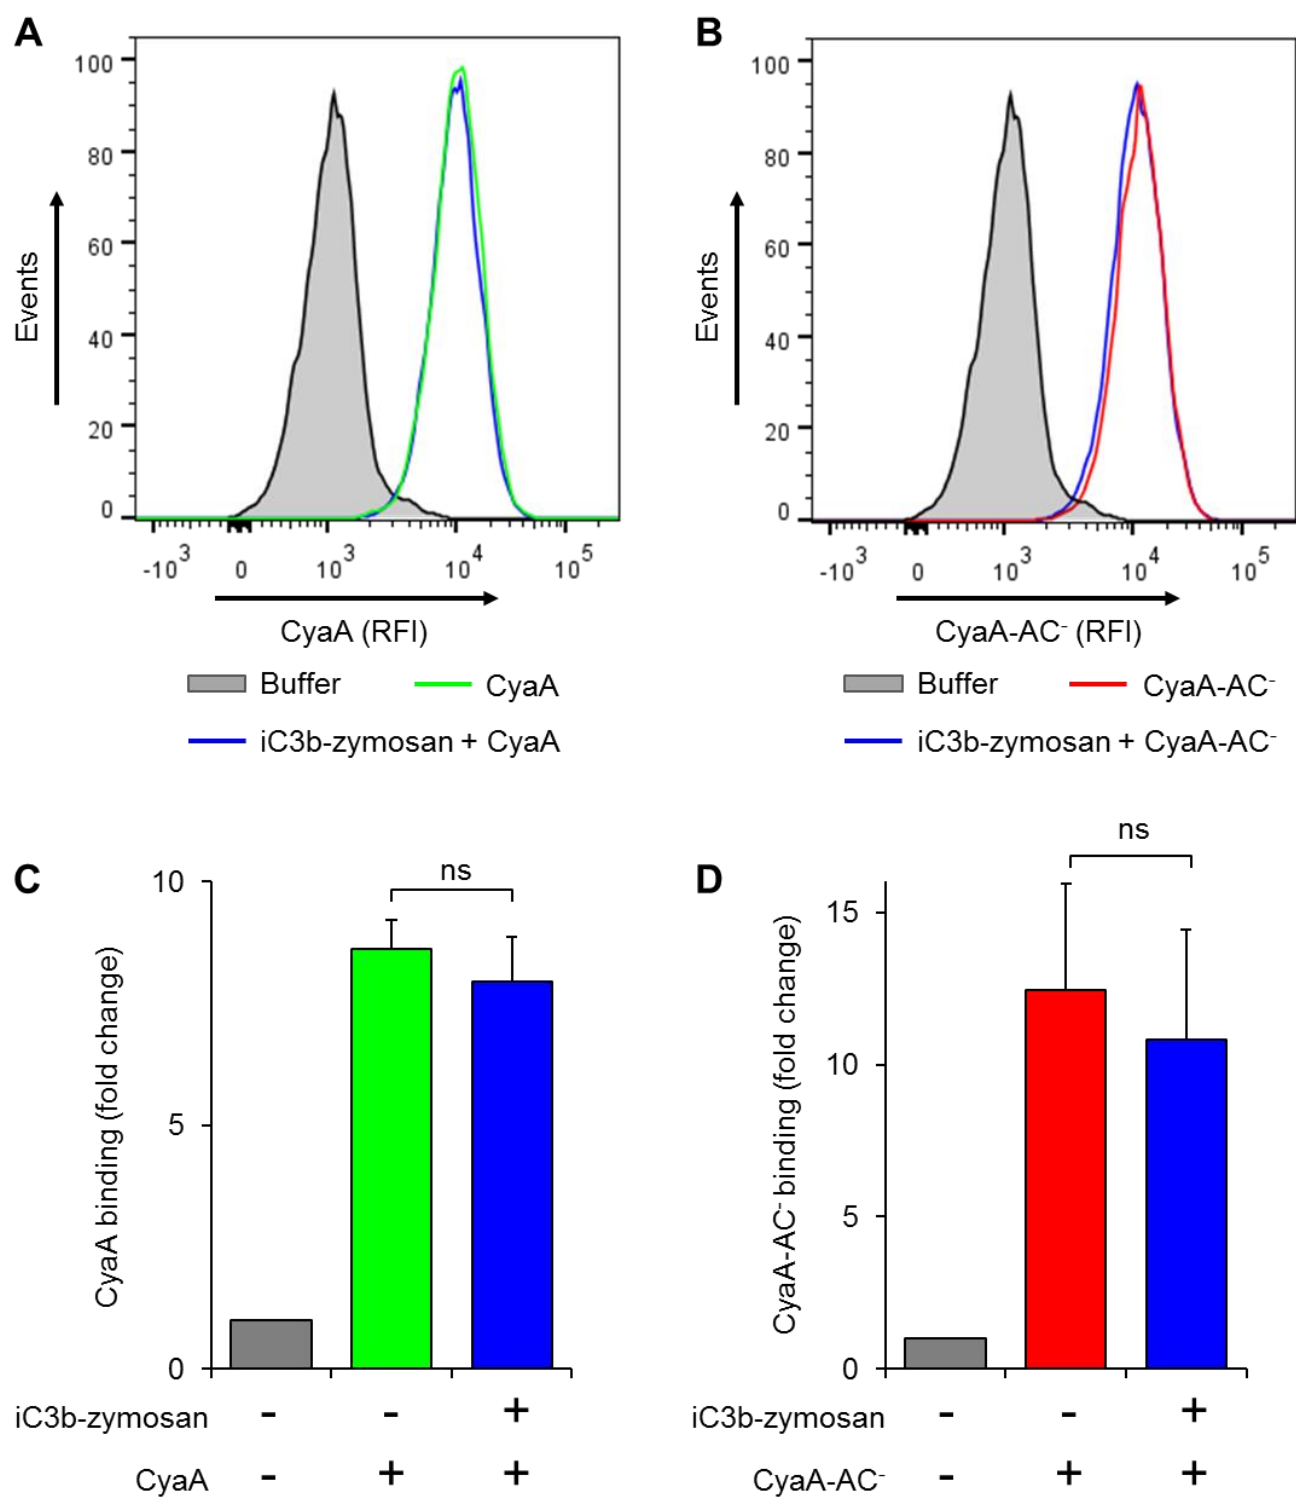

**Figure 7-figure supplement 4**

Supplement: supp [file elife-10766-supp-v1.zip]

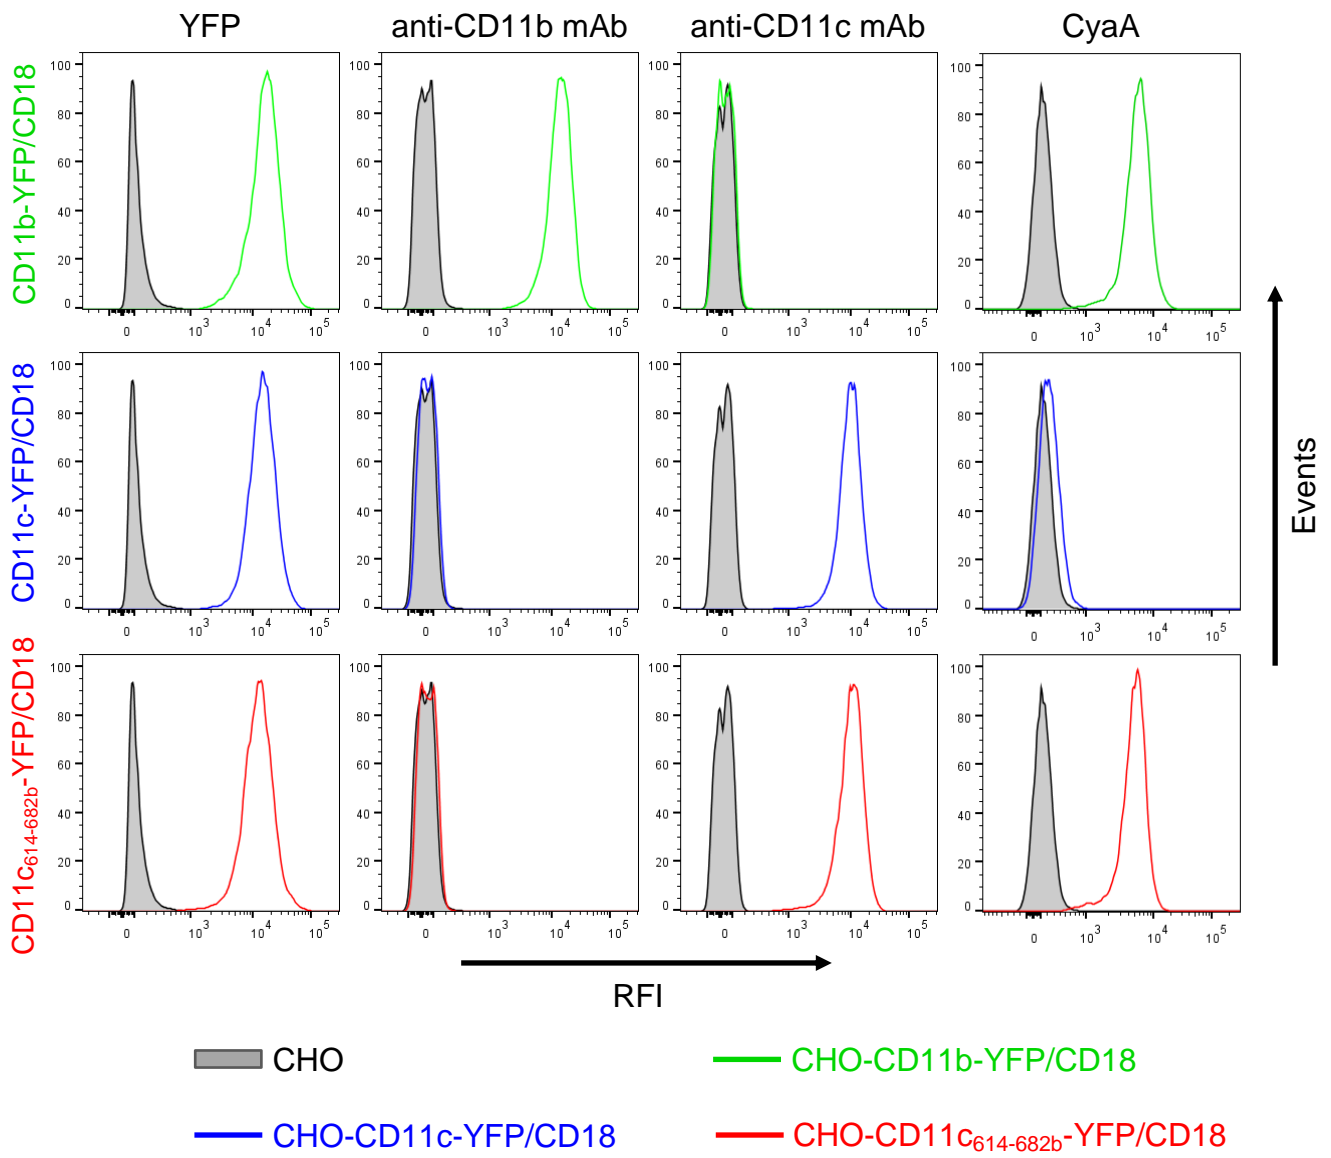

**Figure 3-figure supplement 1**

Supplement: supp [file elife-10766-supp-v1.zip]

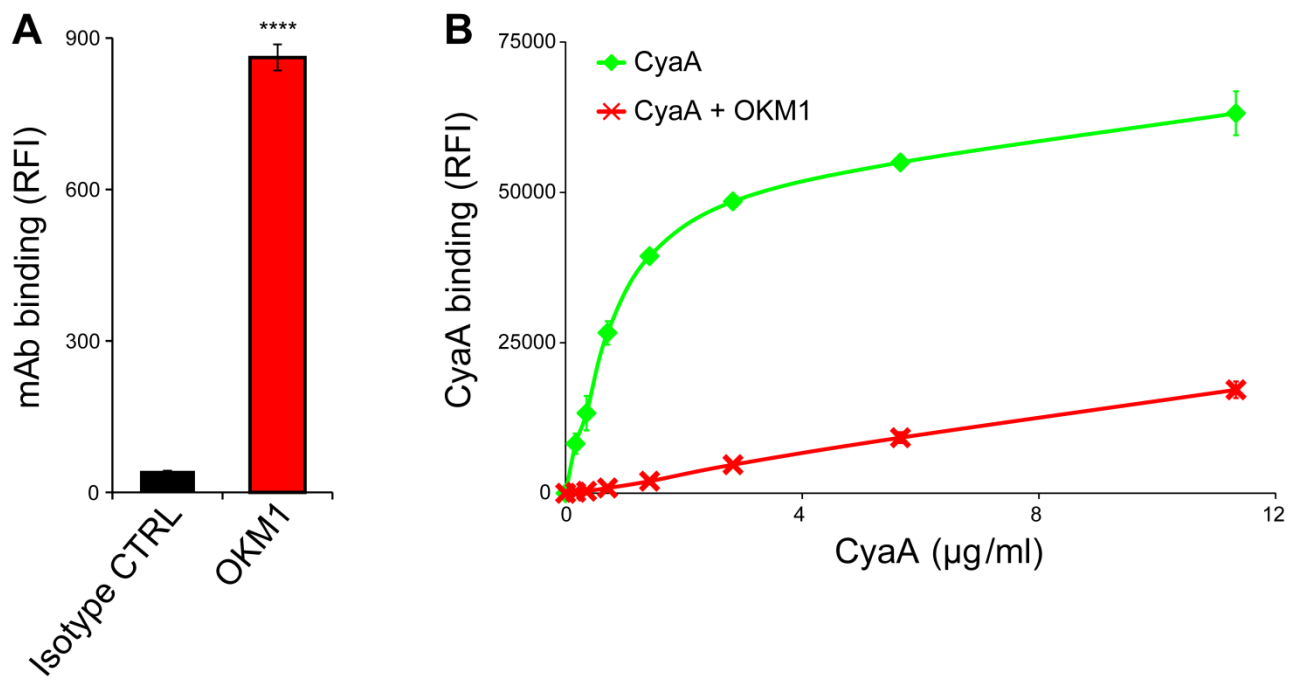

Figure 6-figure supplement 1

Supplement: supp [file elife-10766-supp-v1.zip]

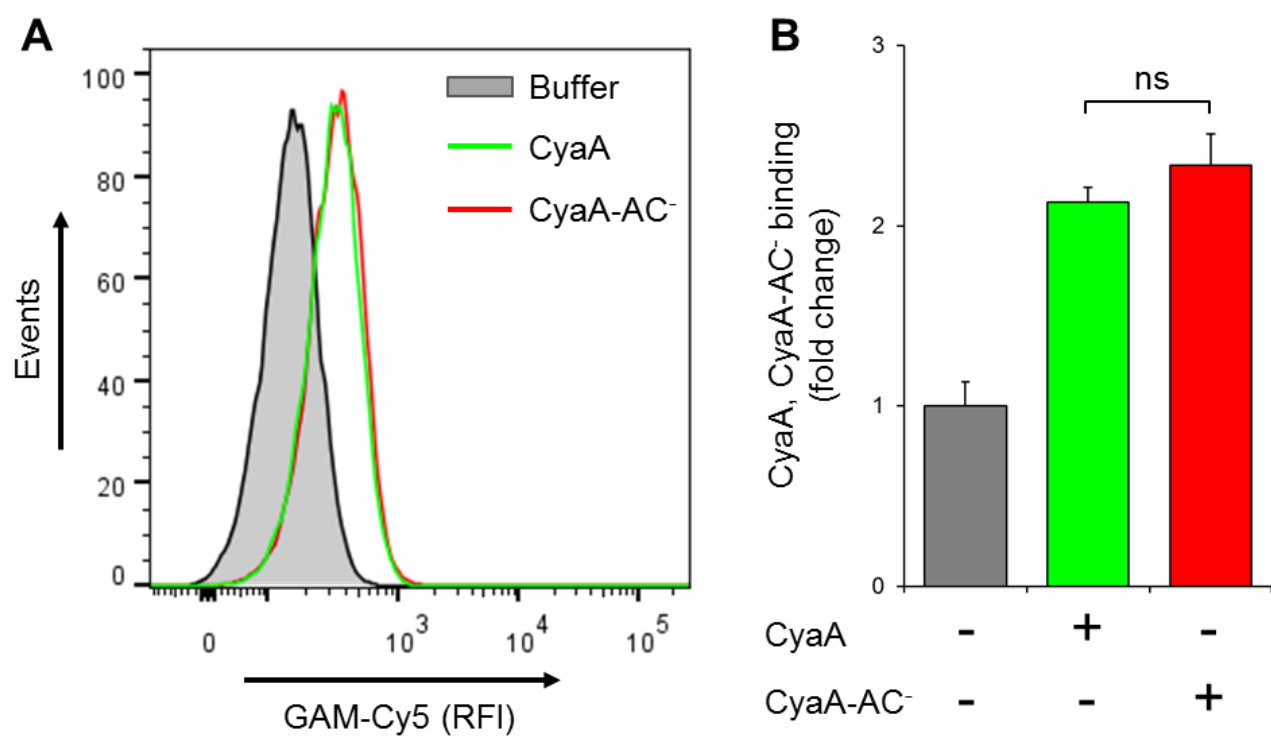

Figure 7-figure supplement 1

Supplement: supp [file elife-10766-supp-v1.zip]

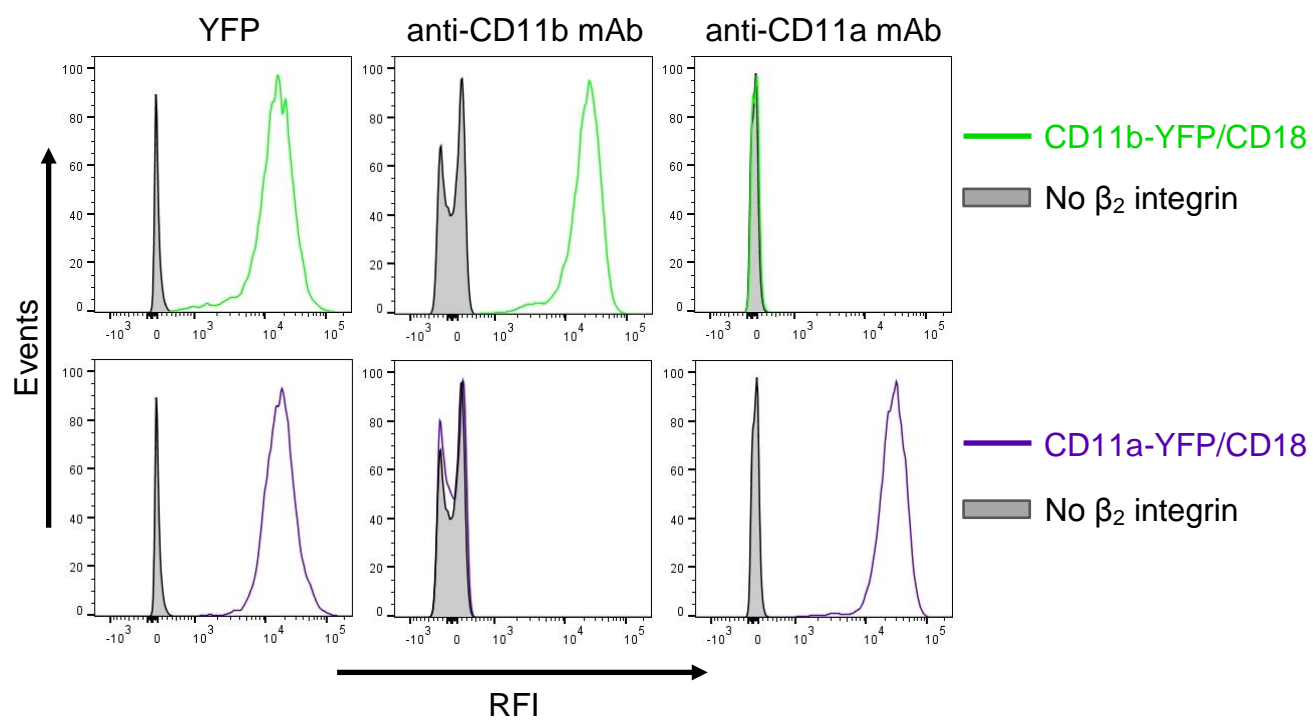

**Figure 9-figure supplement 1**

Supplement: supp [file elife-10766-supp-v1.zip]
